# Supplementary material
Source: PubMed Central journal article supplement (PMC3578299)
Supplement: NIHMS442149-supplement-1_si_001.pdf [file NIHMS442149-supplement-1_si_001.pdf]

1     **Detecting and tracking nosocomial methicillin-resistant *Staphylococcus aureus***  
2                     **using a microfluidic SERS biosensor**

3  
4     **SUPPLEMENTARY INFORMATION**

5             **Chemicals and reagents.** Silver nitrate, sodium citrate, sodium chloride and mineral oil were of  
6 analytical grade and purchased from Sigma-Aldrich. The channel mold was fabricated from SU-8  
7 3050 (MicroChem) using photolithography techniques and bonded to a glass slide substrate  
8 (12-550C, Fisher Scientific). An elastomer base and the curing agent were mixed at the mass ratio of  
9 10:1 (Sylgard 184 silicone elastomer kit (Dow Corning)) to form polydimethylsiloxane (PDMS).  
10 Dow Corning Silastic laboratory tubing (11-189-15 Series, Fisher Scientific) was used to define  
11 inlets/outlets.

12             **Bacterial sample collection and preparation.** Two different bacterial isolate collections were  
13 used in the current study. Collection I was obtained from Tianjin Medical University General  
14 Hospital and Tianjin University, Tianjin, China, and included 38 *S. aureus* isolates collected from  
15 2006-2011 in this hospital (Table S1a). All the isolates were recovered from inpatients and analyzed  
16 using PCR at Tianjin University of Science and Technology. Collection II was obtained from  
17 University of Washington, USA, and contained 20 *S. aureus* isolates (Table S1b). These isolates were  
18 typed by using PCR and MLST at Washington State University. All the isolates were stored frozen  
19 (-80°C) in Luria-Bertani (LB) broth containing 12% glycerol. The bacterial isolates were cultured on  
20 LB agar plates at 37°C under aerobic conditions during the course of the experiment.

21             Overnight cultures of *S. aureus* were harvested by centrifugation at 8,000 ×g to remove broth  
22 components and bacterial metabolites and the pellets were rinsed two times with phosphate buffer

23 saline. The cell number of resultant bacterial culture was determined and correlated to OD<sub>540</sub> value.

24 The OD<sub>540</sub> value of 0.8 correlates with an averaged cell number of 4×10<sup>8</sup> cells per ml.

25 **DNA extraction.** DNA was extracted from the *S. aureus* isolates using the DNeasy Blood &  
26 Tissue Kit (Qiagen, Valencia, CA), following the Gram-positive extraction procedure according to  
27 manufacture protocol. DNA purity and concentration was determined by 260/280 absorbance using a  
28 NanoDrop 1000 instrument (Thermo, Brookfield, WI).

29 **Detection of *mecA* by PCR.** PCR amplification of the *mecA* gene for all the *S. aureus* isolates  
30 obtained from China was accomplished with sequence designing of specific primers as follows, F3:  
31 TGATGCTAAAGTTCAAAAGAGT, and B3: GTAATCTGGAAGTTGTTGAGC. PCR  
32 amplification of the *mecA* gene for all the *S. aureus* isolates obtained from the United States was  
33 accomplished with the specific primers under the conditions described previously<sup>1</sup> using the specific  
34 primers MR1: GTGGAATTGGCCAATACAGG and MR2: TGAGTTCTGCAGTACCGGAT. PCR  
35 was performed using a MJ Research thermocycler (Biodirect Inc. Taunton, MA) with an initial  
36 denaturing step of 5 min at 95°C, followed by 30 cycles of 55°C for 1 min, 72°C for 1 min, and 95°C  
37 for 1 min, and a final extension for 5 min at 72°C. The PCR products were electrophoretically  
38 detected on agarose gel.

39 **MLST.** MLST was performed as described previously under the conditions and with the primer  
40 sets of Enright *et al.*<sup>2</sup>. A detailed analysis of the sequence types for *S. aureus* isolates is summarized  
41 in Table S2. Briefly, the seven house-keeping genes, *arcC*, *aroE*, *glp*, *gmk*, *pta*, *tpi*, and *yqiL* were  
42 PCR amplified using cycling parameters as described above. Each locus was sequenced, and aligned  
43 using the SeqMan software package (DNASTAR, Inc., Madison, WI). Sequences of each locus were  
44 trimmed according to the web-based MLST program [www.mlst.net](http://www.mlst.net). All loci were assigned a locus

45 type number, followed by sequence type assignment based on loci types. Three *S. aureus* isolates did  
46 not align to any current sequence type available through the MLST web-based program. We have  
47 designated these as New ST-1, New ST-2, and New ST-3.

48 **Microfluidic chip fabrication.** The fabrication process is shown in Fig. S1. It began with  
49 deposition of a 40  $\mu\text{m}$  layer of SU-8 3050 on a glass substrate (Fig. S1a). After UV exposure with  
50 masking (Fig. S1b) and SU-8 development (Fig. S1c), the SU-8 mold was defined with the desired  
51 microchannel design. To achieve precise interconnecting interface, silastic tubing was used to form  
52 inlets and outlets<sup>3</sup>. Tubing with knots at both ends was first aligned with the channel mold and was  
53 then fixed using a small amount of PDMS (Fig. S1d). After this tube-fixation step, more PDMS was  
54 poured onto the mold and kept at 50°C for 3 h on a hot plate for curing (Fig. S1e). The cured PDMS  
55 was carefully peeled from the SU-8 master mold (Fig. S1f) and holes were punched to connect  
56 tubing sections to the channels (Fig. S1g). The molded PDMS and two clean glass slides were treated  
57 under oxygen plasma at 50 W and 200 mT for 30 s, and then were quickly pressed together to form a  
58 sandwiched structure (Fig. S1h). Although the irreversible bonding started immediately after these  
59 pieces were brought into contact, as a last step, we chose to heat the glass/PDMS structure on a  
60 hotplate at 75°C for 5 min to strengthen the bond.

61 **Spectral processing.** We first employed a polynomial background fit<sup>4</sup> coupled with baseline  
62 subtraction using minima identification and discrimination via adaptive and least-squares  
63 thresholding<sup>5</sup> to remove fluorescence background derived from the bacterial sample, Gaussian noise,  
64 CCD background noise and cosmic noise. A spectral smooth using a 7-point Savitzky-Golay  
65 algorithm was conducted, followed by normalization for all the spectra. Normalization effectively  
66 removes spectral fluctuation derived from the small focal volume of the bacterial cells<sup>4</sup>.

67 **Discriminatory power.** The numerical index of discrimination was calculated using Simpson's  
68 index of diversity to determine the discriminatory powers of optofluidic-based SERS typing <sup>4</sup>.

69 **Chemometric analysis.** Before chemometric analysis, spectral reproducibility was determined  
70 by calculating the differentiation index ( $D_{y1y2}$ ) value <sup>6</sup>. A supervised discriminant function analysis  
71 (DFA) based dendrogram model was established and validated to differentiate between MRSA and  
72 MSSA isolates from both China and the United States. **The sensitivity and specificity values were**  
73 **calculated using Wards cluster algorithm at the cut-off value established at 99% similarity for the**  
74 **DFA model. A receiver operating characteristic (ROC) curve was generated, with the true positive**  
75 **rate (sensitivity) plotted in function of the false positive rate (1-specificity) for different cut-off**  
76 **points of a parameter. The AUC was subsequently calculated <sup>7,8</sup>.**

77 **An** unsupervised hierarchical cluster analysis (HCA) based dendrogram was established to  
78 determine the correlation between optofluidic-based SERS typing and MLST for epidemiology and  
79 dissemination of MRSA isolates from the United States. Bayesian probability was conducted to  
80 validate the principal components (PCs) selected by principal component analysis (PCA) for the  
81 DFA and HCA based dendrogram models and Monte Carlo estimation was subsequently performed  
82 to determine the stability of these chemometric models <sup>4</sup>.

83 The cross-validated DFA-based dendrogram model was tested for the recognition rate of 20 *S.*  
84 *aureus* isolates derived from a recent outbreak in the summer of 2012 in a hospital in China (the  
85 second hospital affiliated with Tianjin Medical University). The prediction of these isolates was  
86 conducted by projecting the corresponding optofluidic-based SERS spectra into each PC model and  
87 the residual distances were calculated to determine the class to which the prediction data belong.  
88 Both PCR and optofluidic-based SERS typing were conducted at Tianjin University of Science and

89 Technology.

90 MRSA S-93 and MSSA S-N7 isolates were mixed forming a gradient concentration of MRSA  
91 ranging from 5% to 100% on the basis of biomass. The optofluidic-based SERS spectra were  
92 collected for each bacterial mixture and a supervised partial least squares regression (PLSR) model  
93 was established and leave-one-out cross-validated by removing one standard from the data set at a  
94 time and calibrating the remaining standards<sup>4,9</sup>. This linear regression model was evaluated on the  
95 basis of several parameters including regression coefficient (R), latent variable, residual prediction  
96 deviation (RPD), and root mean square error (RMSE) of calibration and prediction<sup>6</sup>.

97

## 98 **References**

- 99 1. Tokue, Y.; Shoji, S.; Satoh, K.; Watanabe, A.; Motomiya, M. *Antimicrob. Agents Chemother.* **1992**, *36*, 6-9.  
100 2. Enright, M. C.; Day, N. P.; Davies, C. E.; Peacock, S. J.; Spratt, B. G. *J. Clin. Microbiol.* **2000**, *38*, 1008-1015.  
101 3. Li, P.; Xue, W.; Xu, J. *Lab Chip Chips and Tips* **2011**.  
102 4. Lu, X.; Huang, Q.; Miller, W. G.; Aston, D. E.; Xu, J.; Xue, F.; Zhang, H. W.; Rasco, B. A.; Wang, S.; Konkel, M.E. *J. Clin.*  
103 *Microbiol.* **2012**, *50*, 2932-2946.  
104 5. Weakley, A. T.; Griffiths, P. R.; Aston, D. E. *Appl. Spectrosc.* **2012**, *66*, 519-529.  
105 6. Lu, X.; Rasco, B. A.; Kang, D. H.; Jabal, J. M.; Aston, D. E.; Konkel, M. E. *Anal. Chem.* **2011**, *83*, 4137-4146.  
106 7. Duraipandian, S.; Zheng, W.; Ng, J.; Low, J. J. H.; Ilancheran, A.; Huang, Z. *Anal. Chem.* **2012**, *84*, 5913-5919.  
107 8. Lui, H.; Zhao, J.; McLean, D.; Zeng, H. *Cancer Res.* **2012**, *72*, 2491-2500.  
108 9. Ellis, D. I.; Brewster, V. L.; Dunn, W. B.; Allwood, J. W.; Golovanov, A. P.; Goodacre, R. *Chem. Soc. Rev.* **2012**, *41*,  
109 5706-5727.

110

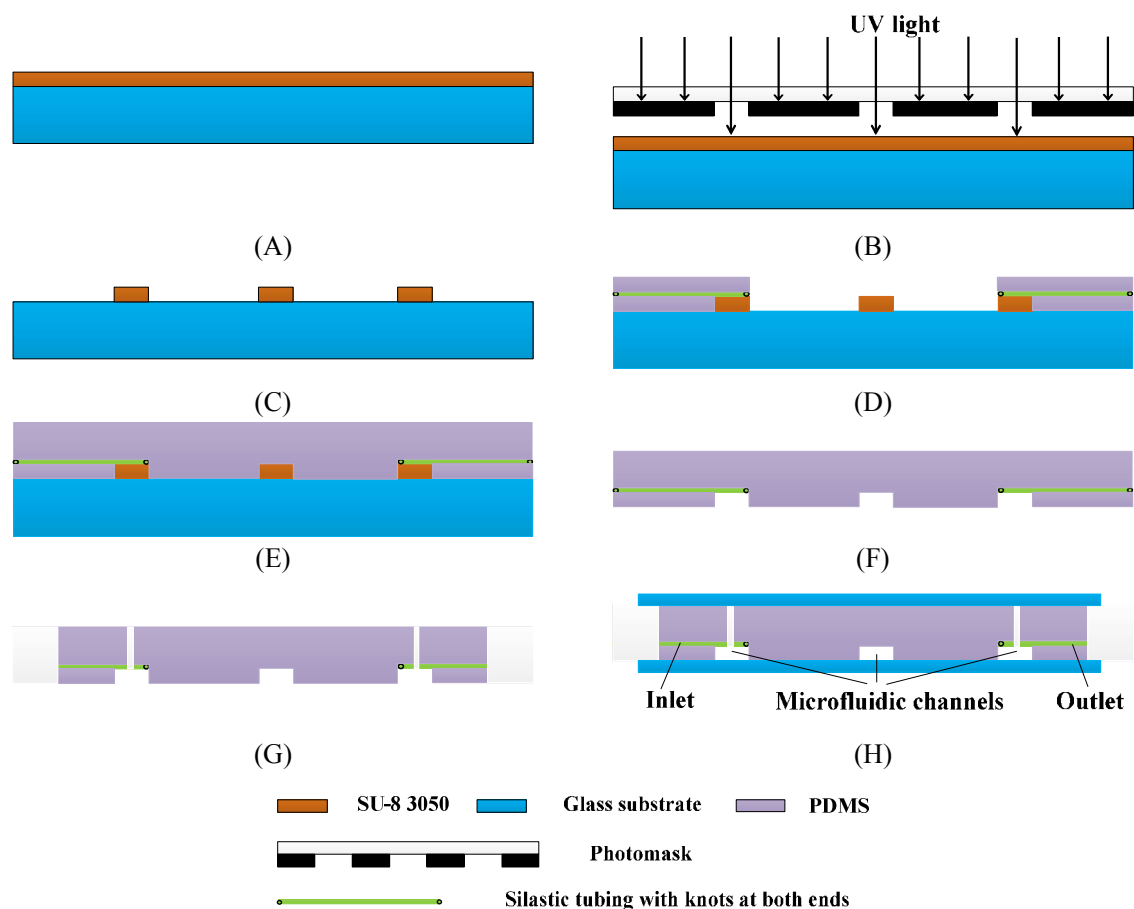

112

113 **Figure S1. Fabrication process for the microfluidics channel device.** (A) SU-8 spin coating on a  
 114 glass substrate. (B) UV exposure with masking. (C) SU-8 development to form channel molds. (D)  
 115 Alignment of tubing with the channel mold and fixation of the tubing with a small amount of PDMS.  
 116 (E) Pouring more PDMS to form channels. (F) Peeling the cured PDMS. (G) Cutting the PDMS into  
 117 desired size and punching holes to form inlets and outlets. (H) Bonding the PDMS to two clean glass  
 118 slides.

119

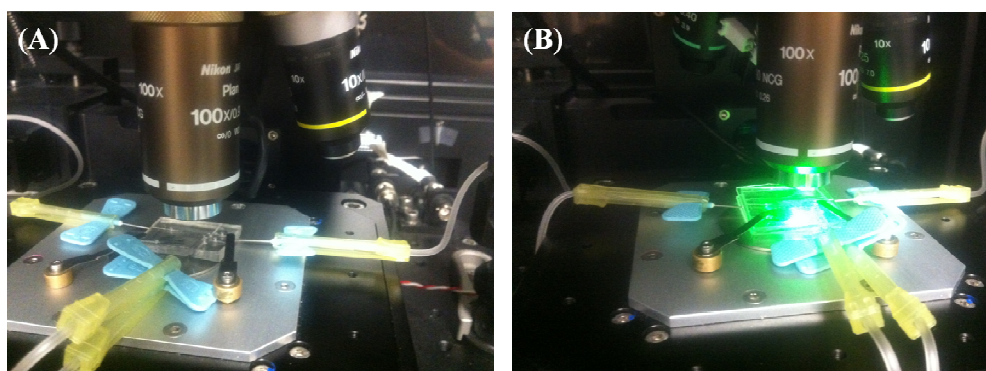

120

121 **Figure S2(a).** Optofluidic platform (A) without and (B) with SERS spectral collection.

122

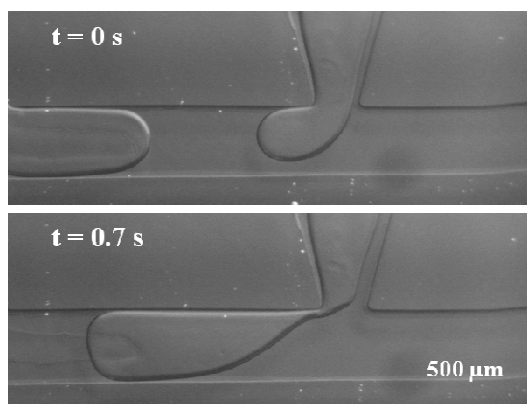

123

124 **Figure S2(b).** Droplet formation from the inlet of the microchannel.

125

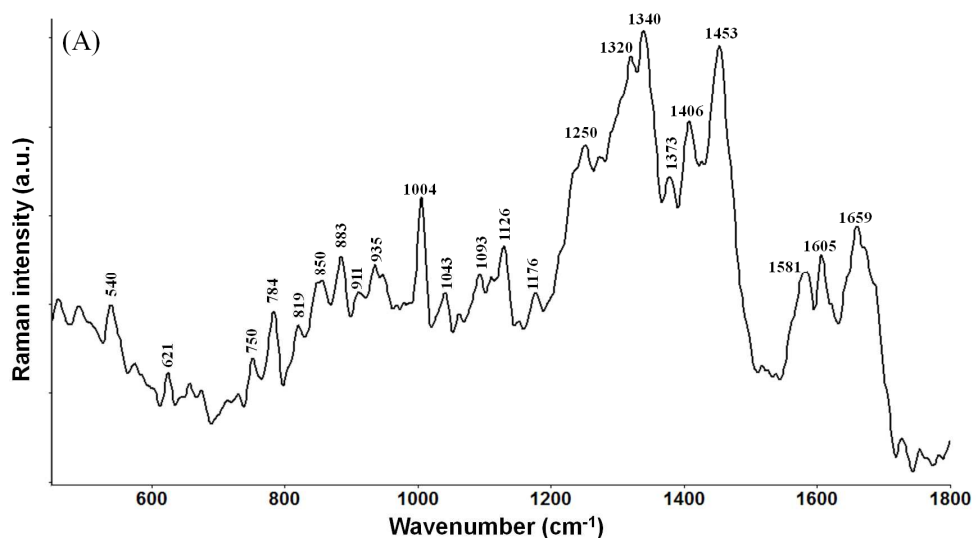

126

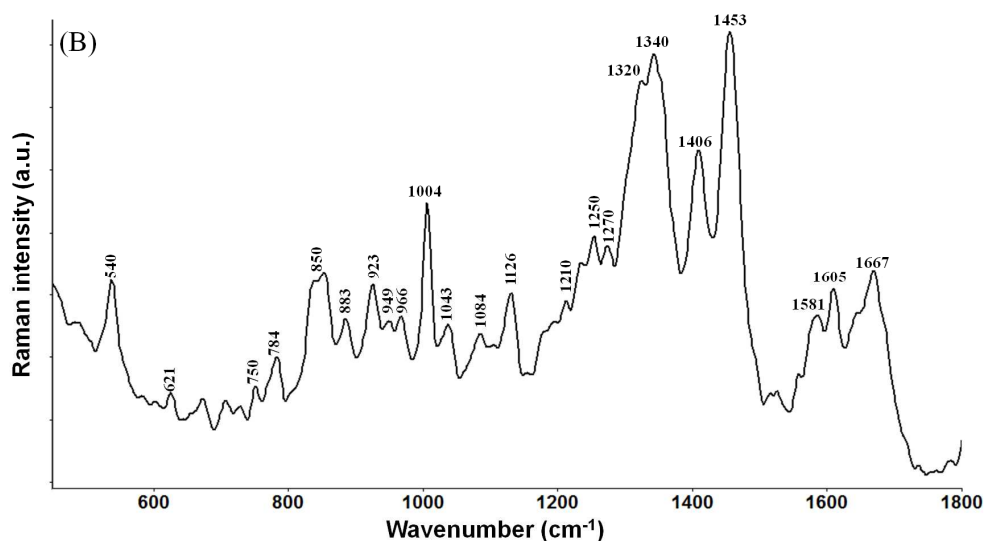

127

128 **Figure S3. Biochemical compositions of *S. aureus* cell membrane:** representative processed SERS  
129 spectra of (A) MRSA and (B) MSSA.

130

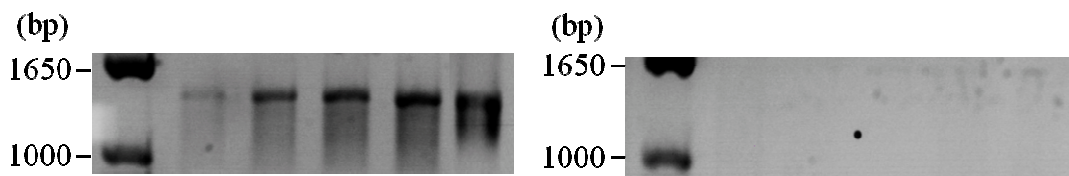

131

132 **Figure S4.** PCR detection of the *mecA* gene in representative *S. aureus* isolates. Panels A): MRSA;  
133 B): MSSA.

134

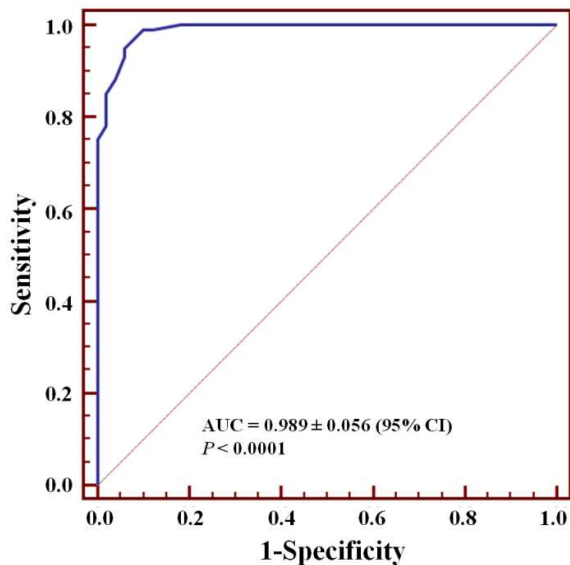

135

136 **Figure S5.** Receiver operating characteristic (ROC) curve of discrimination results for optofluidic  
137 SERS typing of MRSA and MSSA. The curve and 95% CI are derived from the respective cut-off  
138 thresholds and the AUC is significant ( $P < 0.0001$ ).

139

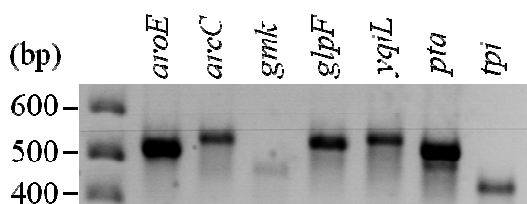

140

141 **Figure S6.** The allelic profile of *S. aureus* isolates.

142



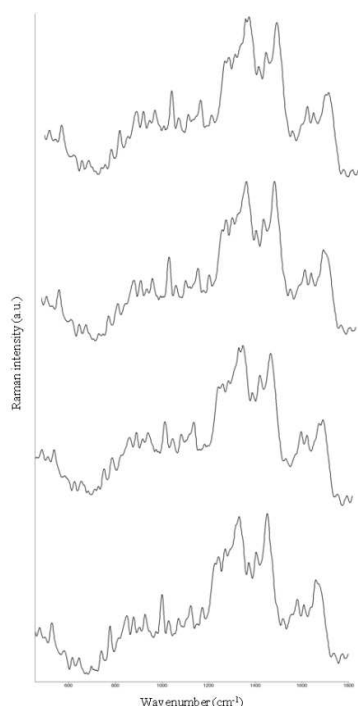

143  
 144 **Figure S7.** Optofluidic SERS spectral features of four different patterns of MRSA (from top to  
 145 bottom: S-FF3 for Raman pattern 1, S-FF7 for Raman pattern 2, S-FF1 for Raman pattern 3, and  
 146 S-FF9 for Raman pattern 4).  
 147

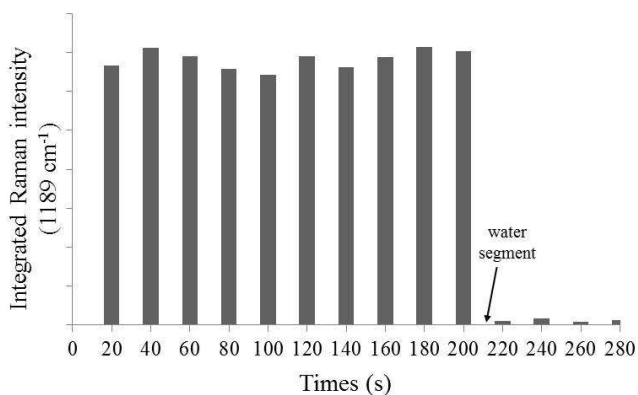

148  
 149 **Figure S8.** The SERS spectrum cannot be detected for the water segment after abrupt ceasing the  
 150 flow of crystal violet.  
 151

152 **Table S1(a).** The detection of the *mecA* gene in 38 *S. aureus* isolates from China.

| ID | Strain number | <i>mecA</i> * | ID | Strain number | <i>mecA</i> |
|----|---------------|---------------|----|---------------|-------------|
| 1  | S-N4          | +             | 20 | S-93          | +           |
| 2  | S-N7          | -             | 21 | S-94          | +           |
| 3  | S-0           | +             | 22 | S-95          | -           |
| 4  | S-7           | +             | 23 | S-96          | -           |
| 5  | S-71          | +             | 24 | S-100         | -           |
| 6  | S-72          | -             | 25 | S-101         | +           |

|    |      |   |    |        |   |
|----|------|---|----|--------|---|
| 7  | S-73 | - | 26 | S-102  | + |
| 8  | S-75 | - | 27 | S-103  | + |
| 9  | S-76 | - | 28 | S-104  | - |
| 10 | S-77 | - | 29 | S-105  | + |
| 11 | S-78 | - | 30 | S-106  | + |
| 12 | S-79 | + | 31 | S-8024 | + |
| 13 | S-80 | - | 32 | S-8023 | + |
| 14 | S-82 | - | 33 | S-8021 | + |
| 15 | S-83 | - | 34 | S-5084 | + |
| 16 | S-84 | + | 35 | S-7003 | + |
| 17 | S-85 | + | 36 | S-3550 | - |
| 18 | S-87 | + | 37 | S-2821 | - |
| 19 | S-89 | + | 38 | S-2824 | + |

153 \*The (+) indicates *mecA* positive and (-) indicates *mecA* negative.

154

155 **Table S1(b).** The detection of the *mecA* gene in 20 *S. aureus* isolates from the United States.

| ID | Strain number | <i>mecA</i> | ID | Strain number | <i>mecA</i> |
|----|---------------|-------------|----|---------------|-------------|
| 1  | S-FF1         | +           | 11 | S-FF11        | +           |
| 2  | S-FF2         | +           | 12 | S-FF12        | +           |
| 3  | S-FF3         | +           | 13 | S-FF13        | +           |
| 4  | S-FF4         | +           | 14 | S-FF14        | +           |
| 5  | S-FF5         | +           | 15 | S-FF15        | +           |
| 6  | S-FF6         | +           | 16 | S-FF16        | -           |
| 7  | S-FF7         | +           | 17 | S-FF17        | -           |
| 8  | S-FF8         | +           | 18 | S-FF18        | -           |
| 9  | S-FF9         | +           | 19 | S-FF19        | -           |
| 10 | S-FF10        | +           | 20 | S-FF20        | -           |

156

157 **Table S2.** Sequence types for *S. aureus* isolates from the United States.

| <i>S. aureus</i> isolate | <i>arcC</i> | <i>aroE</i>      | <i>glpF</i> | <i>gmk</i> | <i>pta</i> | <i>tpi</i> | <i>yqil</i> | ST       |
|--------------------------|-------------|------------------|-------------|------------|------------|------------|-------------|----------|
| S-FF1                    | 3           | 99% similar (3)* | 1           | 1          | 4          | 4          | 3           | New ST-1 |
| S-FF2                    | 3           | 3                | 1           | 1          | 4          | 4          | 3           | 8        |
| S-FF3                    | 1           | 145              | 1           | 19         | 12         | 1          | 10          | New ST-2 |
| S-FF4                    | 3           | 3                | 1           | 1          | 4          | 4          | 3           | 8        |
| S-FF5                    | 3           | 3                | 1           | 1          | 4          | 4          | 3           | 8        |
| S-FF6                    | 3           | 3                | 1           | 1          | 4          | 4          | 3           | 8        |
| S-FF7                    | 1           | 4                | 1           | 4          | 12         | 1          | 10          | 5        |
| S-FF8                    | 3           | 3                | 1           | 1          | 4          | 4          | 3           | 8        |
| S-FF9                    | 3           | 3                | 1           | 1          | 4          | 4          | 3           | 8        |
| S-FF10                   | 3           | 3                | 1           | 1          | 4          | 4          | 3           | 8        |
| S-FF11                   | 3           | 3                | 1           | 1          | 4          | 4          | 3           | 8        |
| S-FF12                   | 3           | 3                | 1           | 1          | 4          | 4          | 3           | 8        |
| S-FF13                   | 3           | 3                | 1           | 1          | 4          | 4          | 3           | 8        |
| S-FF14                   | 3           | 3                | 1           | 1          | 4          | 4          | 3           | 8        |

|        |    |    |   |   |    |   |    |          |
|--------|----|----|---|---|----|---|----|----------|
| S-FF15 | 3  | 3  | 1 | 1 | 4  | 4 | 3  | 8        |
| S-FF16 | 2  | 2  | 2 | 2 | 6  | 3 | 2  | 30       |
| S-FF17 | 12 | 31 | 1 | 4 | 12 | 1 | 3  | New ST-3 |
| S-FF18 | 3  | 3  | 1 | 1 | 4  | 4 | 3  | 8        |
| S-FF19 | 2  | 2  | 2 | 2 | 6  | 3 | 2  | 30       |
| S-FF20 | 1  | 31 | 1 | 4 | 12 | 1 | 10 | 641      |

---

158 \* 99% similar to *aroE* sequence type 3: amino acid T379C

160 **Table S3.** Band assignments for the processed SERS spectra of MRSA and MSSA.

| MRSA                              |                                                | MSSA                              |                                                |
|-----------------------------------|------------------------------------------------|-----------------------------------|------------------------------------------------|
| Wavenumber<br>(cm <sup>-1</sup> ) | Band assignment                                | Wavenumber<br>(cm <sup>-1</sup> ) | Band assignment                                |
|                                   |                                                | <u>1667</u>                       | $\alpha$ -helix of amide I                     |
| <u>1659</u> *                     | $\alpha$ -helix of amide I                     |                                   |                                                |
| 1605                              | phenylalanine, tyrosine, C=C (protein)         | 1605                              | phenylalanine, tyrosine, C=C (protein)         |
| 1581                              | phenylalanine                                  | 1581                              | phenylalanine                                  |
| 1453                              | C-H bending of protein                         | 1453                              | C-H bending of protein                         |
| 1406                              | $\nu_s$ COO <sup>-</sup> of protein            | 1406                              | $\nu_s$ COO <sup>-</sup> of protein            |
| <u>1373</u>                       | ring breathing modes of the DNA/RNA bases      |                                   |                                                |
| 1340                              | nucleic acid modes                             | 1340                              | nucleic acid modes                             |
| 1320                              | G (DNA/RNA)                                    | 1320                              | G (DNA/RNA)                                    |
|                                   |                                                | <u>1270</u>                       | amide III                                      |
| 1250                              | amide III                                      | 1250                              | amide III                                      |
|                                   |                                                | <u>1210</u>                       | C-H bending of tyrosine                        |
| <u>1176</u>                       | C-H bending of tyrosine                        |                                   |                                                |
| 1126                              | $\nu$ (C-C) skeletal of acyl backbone in lipid | 1126                              | $\nu$ (C-C) skeletal of acyl backbone in lipid |
| <u>1093</u>                       | DNA backbone-phosphate backbone                |                                   |                                                |
|                                   |                                                | <u>1084</u>                       | phosphodiester groups in nucleic acid          |
| 1043                              | carbohydrate                                   | 1043                              | carbohydrate                                   |
| 1004                              | phenylalanine                                  | 1004                              | phenylalanine                                  |
|                                   |                                                | <u>966</u>                        | lipids                                         |
|                                   |                                                | <u>949</u>                        | amino acids                                    |
| <u>935</u>                        | $\alpha$ -helix of protein                     |                                   |                                                |
|                                   |                                                | <u>923</u>                        | C-C stretch of carbohydrate                    |
| <u>911</u>                        | C-C stretch of carbohydrate                    |                                   |                                                |
| 883                               | protein                                        | 883                               | protein                                        |
| 850                               | tyrosine                                       | 850                               | tyrosine                                       |
| <u>819</u>                        | protein band                                   |                                   |                                                |
| 784                               | phosphodiester                                 | 784                               | phosphodiester                                 |
| 750                               | symmetric breathing of tryptophan              | 750                               | symmetric breathing of tryptophan              |
| 621                               | C-C twisting mode of phenylalanine             | 621                               | C-C twisting mode of phenylalanine             |
| 540                               | $\nu$ (S-S) amino acid cysteine                | 540                               | $\nu$ (S-S) amino acid cysteine                |

161 \*The numbers underlined indicate spectral bands at different wavenumbers between MRSA and MSSA.

162

163 **Table S4.** Recognition rate for optofluidic-based SERS spectra of *S. aureus* clinical isolates from a  
 164 recent nosocomial outbreak in China.

| Isolate                      | <i>mecA</i> | Total no. of spectra | No. of isolate spectra incorrectly classified | % of isolate spectra correctly classified |
|------------------------------|-------------|----------------------|-----------------------------------------------|-------------------------------------------|
| TMU2012S-1                   | +           | 100                  | 2                                             | 98                                        |
| TMU2012S-2                   | +           | 100                  | 1                                             | 99                                        |
| TMU2012S-3                   | -           | 100                  | 8                                             | 92                                        |
| TMU2012S-4                   | -           | 100                  | 1                                             | 99                                        |
| TMU2012S-5                   | -           | 100                  | 7                                             | 93                                        |
| TMU2012S-6                   | +           | 100                  | 4                                             | 96                                        |
| TMU2012S-7                   | +           | 100                  | 0                                             | 100                                       |
| TMU2012S-8                   | -           | 100                  | 6                                             | 94                                        |
| TMU2012S-9                   | +           | 100                  | 8                                             | 92                                        |
| TMU2012S-10                  | +           | 100                  | 9                                             | 91                                        |
| TMU2012S-11                  | +           | 100                  | 5                                             | 95                                        |
| TMU2012S-12                  | -           | 100                  | 5                                             | 95                                        |
| TMU2012S-13                  | +           | 100                  | 0                                             | 100                                       |
| TMU2012S-14                  | -           | 100                  | 5                                             | 95                                        |
| TMU2012S-15                  | -           | 100                  | 5                                             | 95                                        |
| TMU2012S-16                  | +           | 100                  | 9                                             | 91                                        |
| TMU2012S-17                  | +           | 100                  | 7                                             | 93                                        |
| TMU2012S-18                  | +           | 100                  | 4                                             | 96                                        |
| TMU2012S-19                  | +           | 100                  | 5                                             | 95                                        |
| TMU2012S-20                  | -           | 100                  | 9                                             | 91                                        |
| Average recognition rate (%) |             |                      |                                               | 95                                        |

165

166 **Table S5.** PLSR models for prediction of MRSA in a mixture of MSSA and MRSA.

| Species | Conc. range (%) | No. of samples | No. of latent variables | Calibration |                   |                  | Cross-validation |       |        |
|---------|-----------------|----------------|-------------------------|-------------|-------------------|------------------|------------------|-------|--------|
|         |                 |                |                         | R           | RMSE <sup>a</sup> | RPD <sup>b</sup> | R                | RMSE  | RPD    |
| MRSA    | 5-100           | 3300           | 6                       | ≥0.99       | ≤0.37             | ≥16.19           | ≥0.98            | ≤0.44 | ≥10.05 |

167 <sup>a</sup> RMSE, root mean square error; <sup>b</sup> residue prediction deviation.
